# Supplementary material
Source: PubMed Central journal article supplement (PMC7205254)

**Supplementary Figure 1:** (A) Hind limb allograft survival showed a MST of 18.5 days in TBI alone (n=4), MST 24.5 days in TBI + CTLA4-Ig (n=4) , MST 80.5 days in MR1 alone (n=4) and MST 95.5 days in TBI + MR1 (n=3). Groups containing MR1 (MR1 alone and TBI+MR1) showed a significantly better VCA survival compared to TBI alone or TBI + CTLA4-Ig. (B) Donor-specific mixed chimerism was detected in animals treated with MR1 alone or TBI + MR1 alone in case animal survival was beyond 30 days after transplant. Percentage of K<sup>d</sup> positive cells represented the proportion of cells expressing H-2K<sup>d</sup> among PBMC in the blood. Statistical differences were calculated by log-rank test.

**Supplementary Figure 2:** (A) Representative gating strategy for detection of donor haplotype MHC class I expression in CD3<sup>+</sup> T cells. A similar gating strategy was used for B220<sup>+</sup> B cells and CD11b<sup>+</sup> Macrophages. (B) At the time of sacrifice (POD70), mixed chimerims levels of central lymphoid organs (spleen) correlated with chimerism levels detected in peripheral blood. (Data ar representative of 4 mice per group from 2-3 independent experimENTS, \* P<0.05, \*\* P<0.01, NS = no significance, P values were calculated by 2-tailed *t* test)

**Supplementary Figure 3:** The production of IL-2, IL-10 or IL-17 in recipient CD4<sup>+</sup> T lymphocytes was measured to determine CD4<sup>+</sup> T cell reactivity. (A) IL-2 (B) IL-10 (B) IL-17 were measured at various time points im central lymphoid organs (LN). (Data ar representative of at least 3 mice per group from 2-3 independent experimENTS, \* P<0.05, \*\* P<0.01, NS = no significance, P values were calculated by 2-tailed *t* test)

**Supplementary Figure 4:** (A) Representative Treg-mediated suppression measured by CFSE dilution using flow cytometry. Conventional T cells ( $CD4^+CD25^-$ ) were isolated from wild type C57BL/6 mice and labeled with CFSE. Cells were activated with anti-CD3 plus syngeneic bone marrow derived dendritic cells and cultured either alone or in the presence of various Tregs at different Treg-to-Responder ratios. After 72hr, proliferation was determined by CFSE dilution among viable  $CD4^+$  T cells using flow cytometric analysis. (B) Tregs isolated from recipients treated with TBI + CoB showed stronger suppression compared to those of recipients treated with CoB alone. The latter showed a similar suppressive activity than natural Tregs isolated from wild type C57BL/6 animals.

**Supplementary Figure 5:** (A) Representative gating strategy for detection of donor-derived  $Foxp3^+$  T cells isolated from spleen. (B) While the overall percentage of  $Foxp3^+ CD4^+$  T cells was comparable between both groups (left), the percentage of H-2K<sup>d</sup> expression on  $Foxp3^+$  T cells was significantly ( $p>0.05$ ) higher in recipients treated with TBI + CoB compared to CoB at POD70. (Data are representative of 4 mice per group from 2-3 independent experiments, \*  $P<0.05$ , \*\*  $P<0.01$ , NS = no significance, P values were calculated by 2-tailed *t* test)

**Supplementary Figure 6:** (A) Schematic illustration of modified treatment strategies. These included the combination of total body irradiation, CTLA4-Ig, and anti-CD154 mAb (MR1) in the presence of PC 61 either 7 or 30 days after transplant. Graft survival and mixed chimerism analysis were performed as outlined. (B) Depletion of Treg cells using PC61 did neither on POD 7 nor 30 have a deleterious effect on graft survival. In both groups, animals experienced survival up to 100

days (**C-E**) Furthermore, depletion of Treg cells using PC61 did not affect the establishment of multi-lineage stable mixed chimerisms. Statistical differences were calculated by log-rank test.

**Supplementary Figure 7:** (**A**) Representative gating strategy for detection of donor versus recipient derived APC in the recipient thymus. (**B**) The percentage of H-2K<sup>d</sup> expression on CD11c<sup>+</sup> dendritic cells in the thymus was significantly ( $p < 0.01$ ) higher in recipients treated with TBI + CoB compared to CoB at POD70. (Data are representative of 4 mice per group from 2-3 independent experiments, \*  $P < 0.05$ , \*\*  $P < 0.01$ , NS = no significance, P values were calculated by 2-tailed  $t$  test)

Supplementary Figure 1

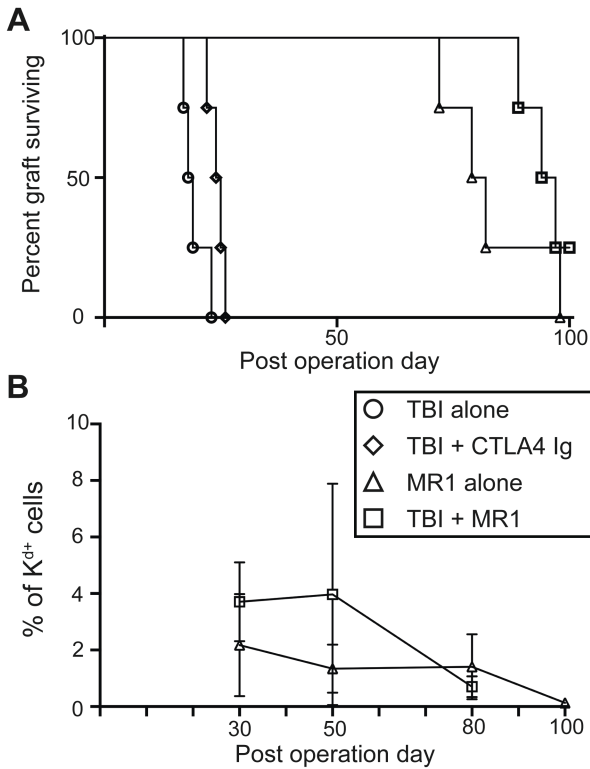

Supplementary Figure 2

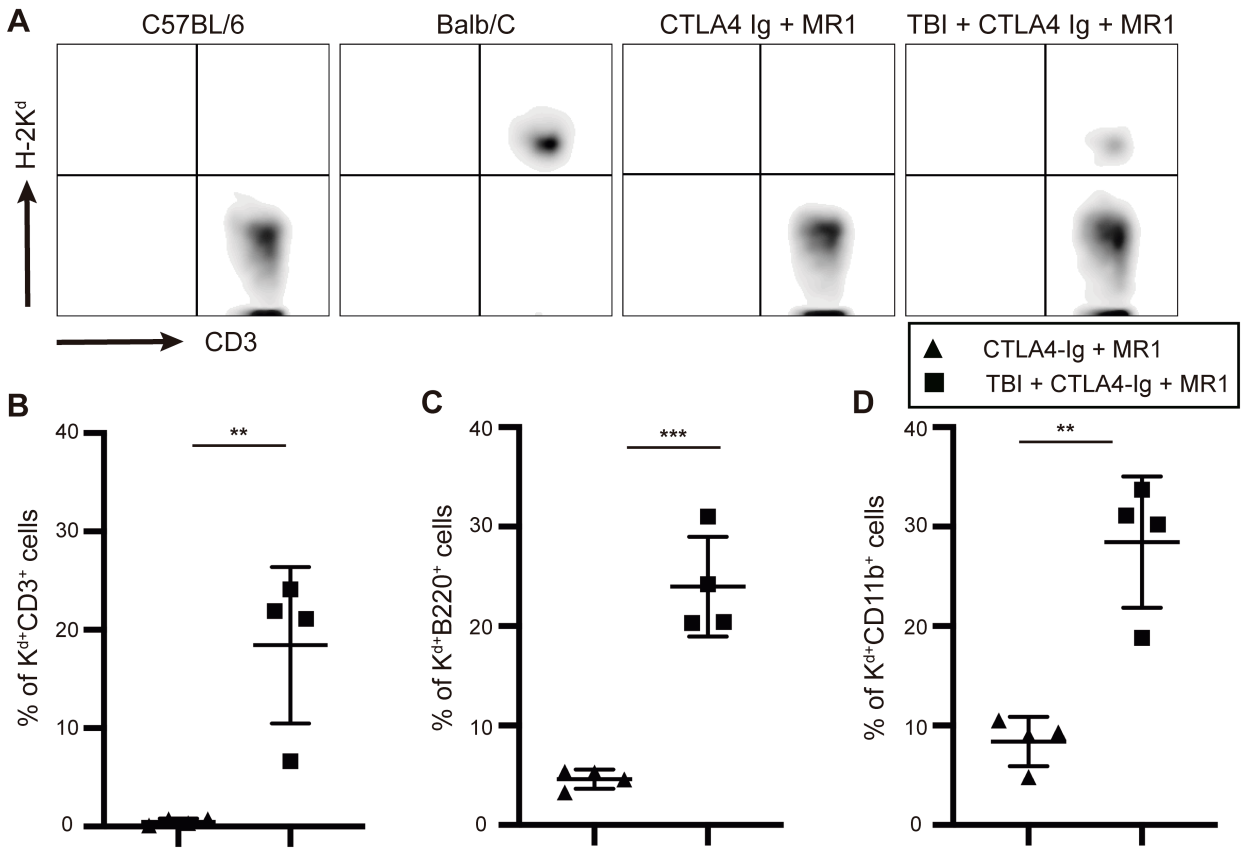

Supplementary Figure 3

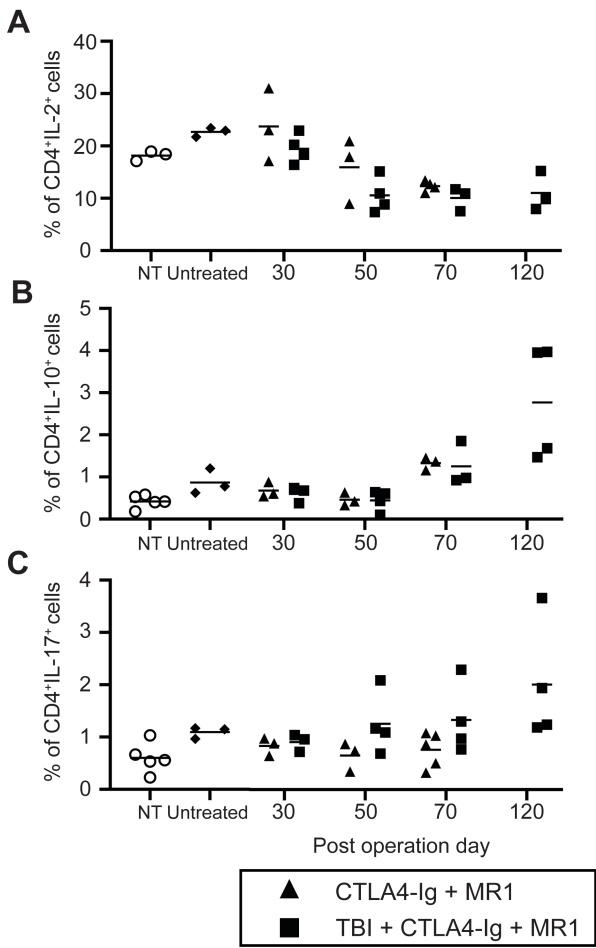

Supplementary Figure 4

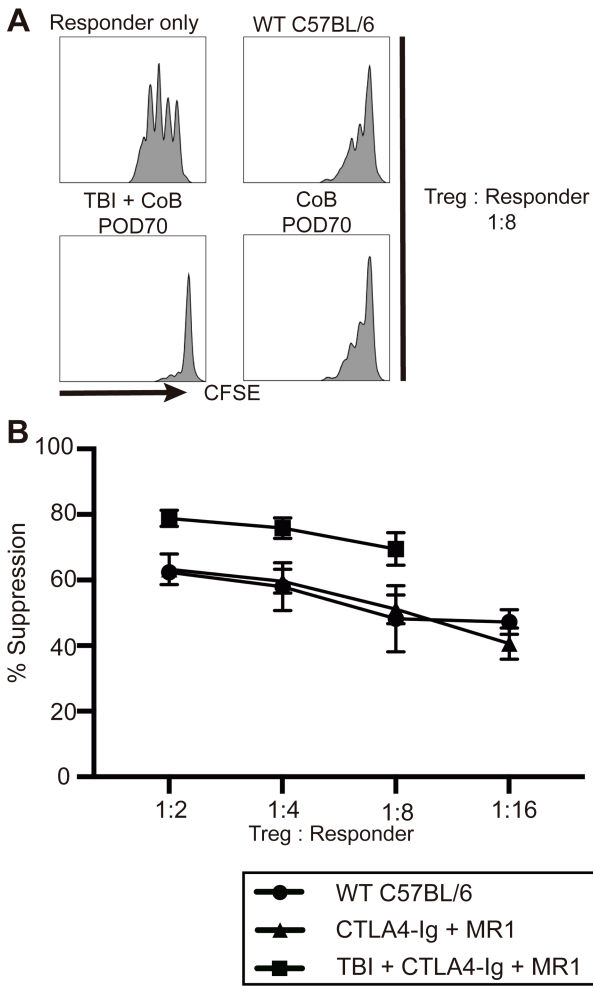

Supplementary Figure 5

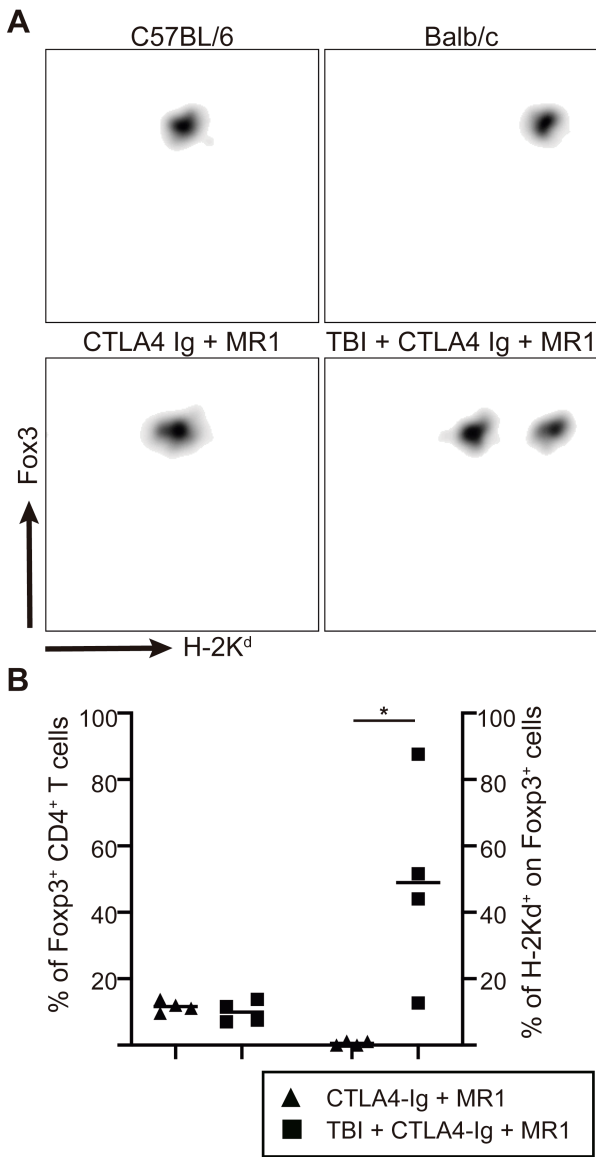

Supplementary Figure 6

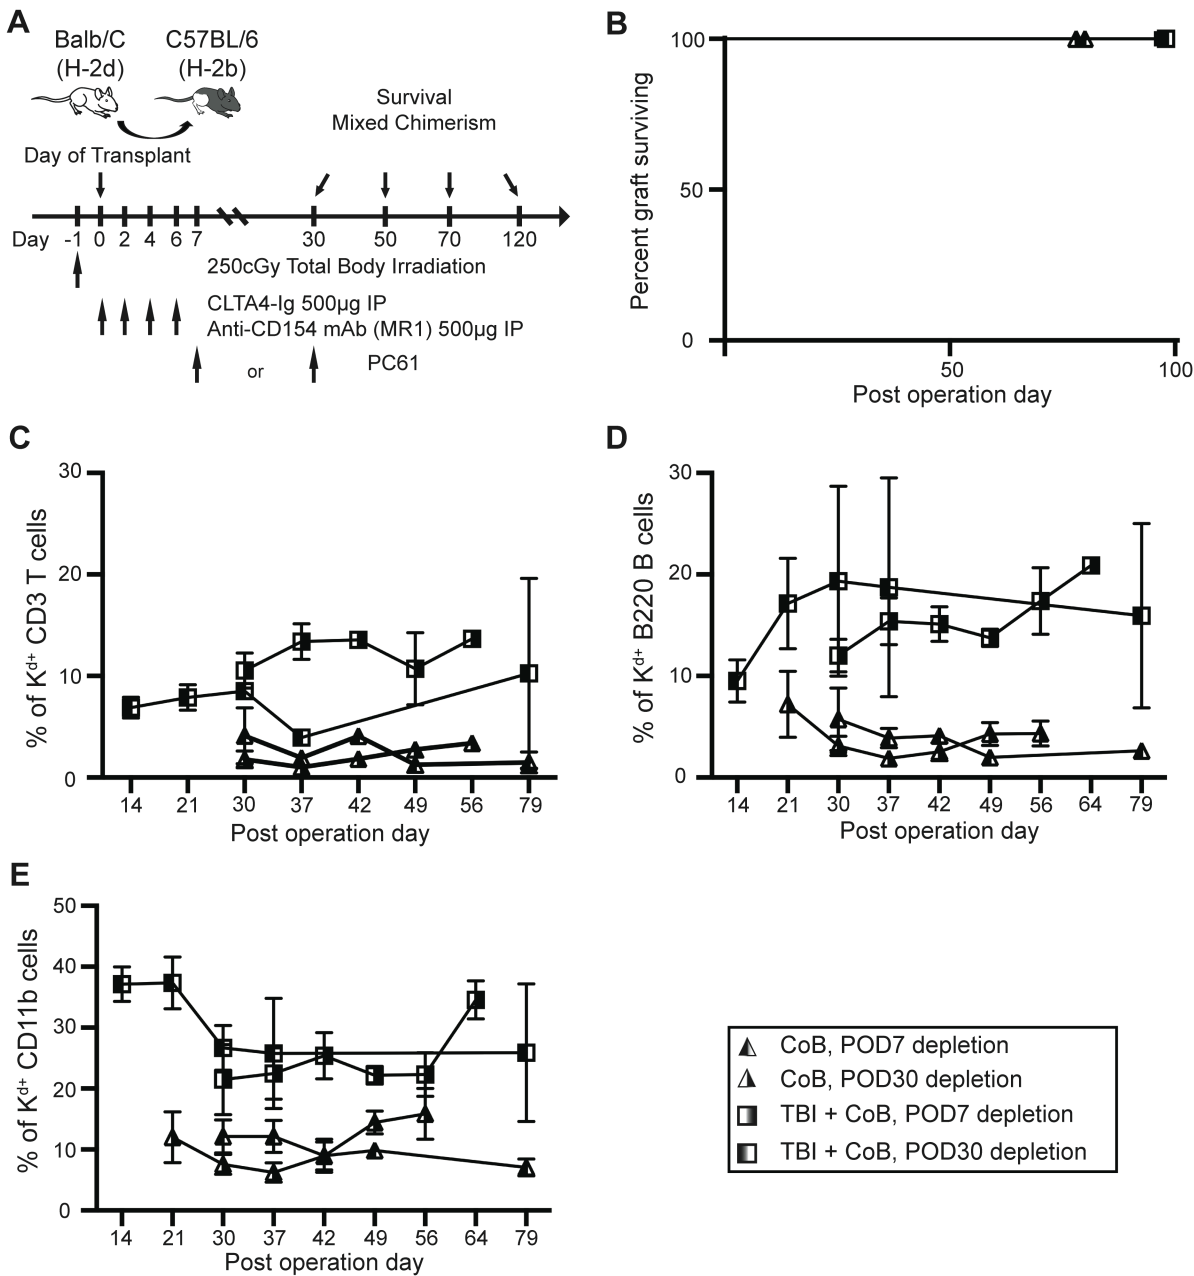

Supplementary Figure 7

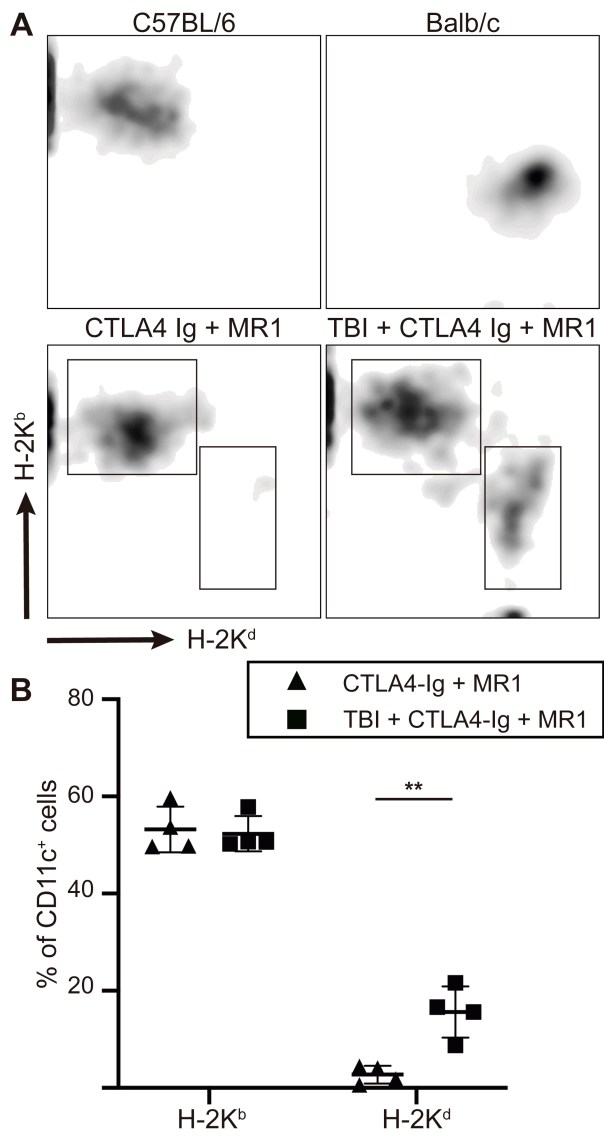

Supplement: jciinsight-5-128560-s043.pdf [file jciinsight-5-128560-s043.pdf]
